# Supplementary material for: Effect of different CT scanners and settings on femoral failure loads calculated by finite element models
Source: PubMed Central journal article supplement (PMC6120464; doi:10.1002/jor.23890), 2018-04-20
Supplement: JOR-36-2288-s001.pdf [file JOR-36-2288-s001.pdf]

**Table S-1: Outcomes of the standard scan on each CT scanner for each femur separately. Note that the standard deviations (SD) of the HU are mainly caused by the anatomy of the bone structure within the ROI.**

|                         |                                | Femur | P1         | P2         | GE         | To         |
|-------------------------|--------------------------------|-------|------------|------------|------------|------------|
| <b>Cortical ROI</b>     | <b>HU</b>                      | #1    | 1043 (328) | 1032 (358) | 1004 (352) | 1083 (381) |
|                         |                                | #2    | 1181 (238) | 1197 (238) | 1158 (234) | 1234 (264) |
|                         |                                | #3    | 1095 (125) | 1107 (116) | 1065 (135) | 1162 (157) |
|                         |                                | #4    | 1125 (234) | 1131 (228) | 1102 (223) | 1144 (252) |
|                         |                                | #5    | 1175 (237) | 1180 (224) | 1134 (247) | 1228 (266) |
|                         |                                | #6    | 1290 (114) | 1289 (111) | 1253 (112) | 1341 (130) |
|                         | <b>BMD (mg/cm<sup>3</sup>)</b> | #1    | 908        | 927        | 874        | 876        |
|                         |                                | #2    | 1028       | 1075       | 1009       | 999        |
|                         |                                | #3    | 963        | 993        | 932        | 944        |
|                         |                                | #4    | 989        | 1015       | 964        | 930        |
|                         |                                | #5    | 1032       | 1056       | 992        | 997        |
|                         |                                | #6    | 1133       | 1154       | 1097       | 1089       |
| <b>Trabecular ROI</b>   | <b>HU</b>                      | #1    | 103 (97)   | 99 (103)   | 108 (100)  | 98 (103)   |
|                         |                                | #2    | 318 (139)  | 311 (152)  | 315 (141)  | 317 (148)  |
|                         |                                | #3    | 308 (182)  | 307 (190)  | 314 (173)  | 311 (182)  |
|                         |                                | #4    | 278 (139)  | 267 (166)  | 280 (154)  | 278 (148)  |
|                         |                                | #5    | 130 (131)  | 126 (139)  | 140 (130)  | 132 (130)  |
|                         | <b>BMD (mg/cm<sup>3</sup>)</b> | #1    | 88         | 91         | 91         | 76         |
|                         |                                | #2    | 276        | 281        | 272        | 254        |
|                         |                                | #3    | 271        | 277        | 272        | 249        |
|                         |                                | #4    | 245        | 241        | 242        | 222        |
|                         |                                | #5    | 114        | 115        | 119        | 104        |
| <b>Failure load (N)</b> | #1                             | 2309  | 2517       | 2590       | 2096       |            |
|                         | #2                             | 7152  | 7500       | 7224       | 6429       |            |
|                         | #3                             | 4778  | 5170       | 5315       | 4543       |            |
|                         | #4                             | 6824  | 6012       | 6677       | 5385       |            |
|                         | #5                             | 1272  | 1340       | 1499       | 1218       |            |
|                         | #6                             | 4283  | 4140       | 4244       | 3815       |            |
