# Supplementary material for: Effect of different CT scanners and settings on femoral failure loads calculated by finite element models
Source: PubMed Central journal article supplement (PMC6120464; doi:10.1002/jor.23890), 2018-04-20
Supplement: JOR-36-2288-s002.pdf [file JOR-36-2288-s002.pdf]

**Table S-2: Output of the statistical linear mixed models (difference, 95% confidence interval and p-value) of the absolute differences between the CT scanners using the standard protocol (3 mm slices, FOV 480, standard kernel), for HU and BMD in the cortical and trabecular ROI, and simulated failure load (N).**

| <b>Cortical HU</b>                        |            |                |         |
|-------------------------------------------|------------|----------------|---------|
| Scanners                                  | Difference | 95% CI         | p-value |
| P1-P2                                     | -9.1       | -15.1 – -3.1   | 0.003   |
| P1-GE                                     | 28.5       | 22.6 – 34.5    | <0.001  |
| P1-To                                     | -54.1      | -60.1 – -48.1  | <0.001  |
| P2-GE                                     | 37.6       | 31.6 – 43.6    | <0.001  |
| P2-To                                     | -45.0      | -51 – -39      | <0.001  |
| GE-To                                     | -82.6      | -88.6 – -76.6  | <0.001  |
| <b>Cortical BMD (mg/cm<sup>3</sup>)</b>   |            |                |         |
| Scanners                                  | Difference | 95% CI         | p-value |
| P1-P2                                     | -35.1      | -41.7 – -28.5  | <0.001  |
| P1-GE                                     | 22.9       | 16.3 – 29.5    | <0.001  |
| P1-To                                     | 24.2       | 17.6 – 30.7    | <0.001  |
| P2-GE                                     | 58.0       | 51.4 – 64.6    | <0.001  |
| P2-To                                     | 59.3       | 52.7 – 65.8    | <0.001  |
| GE-To                                     | 1.3        | -5.3 – 7.8     | 0.7     |
| <b>Trabecular HU</b>                      |            |                |         |
| Scanners                                  | Difference | 95% CI         | p-value |
| P1-P2                                     | 5.9        | 3.7 – 8.1      | <0.001  |
| P1-GE                                     | -3.3       | -5.5 – -1      | 0.004   |
| P1-To                                     | 2.2        | 0 – 4.4        | 0.05    |
| P2-GE                                     | -9.2       | -11.4 – -6.9   | <0.001  |
| P2-To                                     | -3.7       | -5.9 – -1.5    | 0.001   |
| GE-To                                     | 5.5        | 3.2 – 7.7      | <0.001  |
| <b>Trabecular BMD (mg/cm<sup>3</sup>)</b> |            |                |         |
| Scanners                                  | Difference | 95% CI         | p-value |
| P1-P2                                     | -3.1       | -7.7 – 1.6     | 0.2     |
| P1-GE                                     | -3.4       | -8 – 1.3       | 0.2     |
| P1-To                                     | 17.6       | 13 – 22.2      | <0.001  |
| P2-GE                                     | -0.3       | -4.9 – 4.3     | 0.9     |
| P2-To                                     | 20.7       | 16 – 25.3      | <0.001  |
| GE-To                                     | 21.0       | 16.3 – 25.6    | <0.001  |
| <b>Failure load (N)</b>                   |            |                |         |
| Scanners                                  | Difference | 95% CI         | p-value |
| P1-P2                                     | -82.7      | -266 – 100.6   | 0.4     |
| P1-GE                                     | -79.0      | -262.4 – 104.3 | 0.4     |
| P1-To                                     | 497.0      | 313.6 – 680.3  | <0.001  |
| P2-GE                                     | 3.7        | -179.7 – 187   | 1.0     |
| P2-To                                     | 579.7      | 396.3 – 763    | <0.001  |
| GE-To                                     | 576.0      | 392.7 – 759.3  | <0.001  |
