# Supplementary material for: Effect of different CT scanners and settings on femoral failure loads calculated by finite element models
Source: PubMed Central journal article supplement (PMC6120464; doi:10.1002/jor.23890), 2018-04-20
Supplement: JOR-36-2288-s003.pdf [file JOR-36-2288-s003.pdf]

**Table S-3: Output of the statistical linear mixed models (difference, 95% confidence interval and p-value) of the absolute effects of changes in Slice thickness, FOV and Reconstruction kernel, for HU and BMD in the cortical and trabecular ROI, and simulated failure load (N). \*The interaction between CT scanner and slice thickness or FOV was not significant and therefore, the effects of slice thickness and FOV hold for all of the CT scanners.**

| <b>Cortical HU</b>                        |    |        |                 |         |
|-------------------------------------------|----|--------|-----------------|---------|
|                                           |    | Effect | 95% CI          | p-value |
| Slice thickness*                          |    | 11.5   | 8.5 – 14.5      | <0.001  |
| FOV*                                      |    | -10.8  | -13.8 – -7.8    | <0.001  |
| Kernel                                    | P1 | 102.9  | 96.9 – 108.9    | <0.001  |
|                                           | P2 | -39.7  | -45.6 – -33.7   | <0.001  |
| GE                                        |    | 15.6   | 9.6 – 21.6      | <0.001  |
| To                                        |    | 133.2  | 127.2 – 139.2   | <0.001  |
| <b>Cortical BMD (mg/cm<sup>3</sup>)</b>   |    |        |                 |         |
|                                           |    | Effect | 95% CI          | p-value |
| Slice thickness*                          |    | 11.8   | 8.5 – 15        | <0.001  |
| FOV*                                      |    | -11.0  | -14.3 – -7.7    | <0.001  |
| Kernel                                    | P1 | 25.2   | 18.6 – 31.7     | <0.001  |
|                                           | P2 | 183.2  | 176.6 – 189.8   | <0.001  |
| GE                                        |    | 1.2    | -5.4 – 7.7      | 0.7     |
| To                                        |    | 27.0   | 20.5 – 33.6     | <0.001  |
| <b>Trabecular HU</b>                      |    |        |                 |         |
|                                           |    | Effect | 95% CI          | p-value |
| Slice thickness*                          |    | -1.2   | -2.3 – -0.1     | 0.04    |
| FOV*                                      |    | -1.1   | -2.2 – 0        | 0.05    |
| Kernel                                    | P1 | 2.5    | 0.2 – 4.7       | 0.03    |
|                                           | P2 | -14.9  | -17.1 – -12.6   | <0.001  |
| GE                                        |    | 1.7    | -0.6 – 3.9      | 0.1     |
| To                                        |    | 29.9   | 27.7 – 32.1     | <0.001  |
| <b>Trabecular BMD (mg/cm<sup>3</sup>)</b> |    |        |                 |         |
|                                           |    | Effect | 95% CI          | p-value |
| Slice thickness*                          |    | -1.0   | -3.3 – 1.3      | 0.4     |
| FOV*                                      |    | -0.7   | -3 – 1.7        | 0.6     |
| Kernel                                    | P1 | -14.5  | -19.1 – -9.9    | <0.001  |
|                                           | P2 | 14.6   | 10 – 19.2       | <0.001  |
| GE                                        |    | -2.5   | -7.1 – 2.1      | 0.3     |
| To                                        |    | -12.1  | -16.7 – -7.5    | <0.001  |
| <b>Failure load (N)</b>                   |    |        |                 |         |
|                                           |    | Effect | 95% CI          | p-value |
| Slice thickness*                          |    | 100.5  | 8.9 – 192.2     | 0.03    |
| FOV*                                      |    | -61.8  | -153.5 – 29.8   | 0.2     |
| Kernel                                    | P1 | -312.0 | -495.3 – -128.6 | 0.001   |
|                                           | P2 | 582.5  | 399.2 – 765.8   | <0.001  |
| GE                                        |    | -73.0  | -256.4 – 110.3  | 0.4     |
| To                                        |    | -179.8 | -363.2 – 3.5    | 0.06    |
